# Supplementary material for: Reporting and misreporting of sex differences in the biological sciences
Source: eLife. 2021 Nov 2;10:e70817. doi: 10.7554/eLife.70817 (PMC8562995; doi:10.7554/eLife.70817)
Supplement: Figure 1—source data 1. — All raw data are in Supplementary file 1b and are tabulated in Supplementary file 1c. [file elife-70817-fig1-data1.xlsx]

## Sheet: Fig. 1 source data
Garcia-Sifuentes & Maney (2021). Reporting and Misreporting of Sex Differences in the Biological Sciences
All raw data are in Supplementary File 1b and are tabulated in Supplementary File 1c.
		Major finding	Minor finding	No difference	% comparing
	All disciplines	0.279	0.286	0.238	0.8	Fig. 1A
	Behavior	0.175	0.325	0.3	0.8	Fig. 1B
	Behav. Physiol.	0.35	0.3	0.2	0.85	Fig. 1B
	Endocrinology	0.296296	0.407407	0.222222	0.925926	Fig. 1B
	General Biology	0.111111	0.111111	0.555556	0.777778	Fig. 1B
	Immunology	0.2	0.2	0.3	0.7	Fig. 1B
	Neuroscience	0.111111	0.222222	0	0.333333	Fig. 1B
	Pharmacology	0.181818	0.363636	0.272727	0.818182	Fig. 1B
	Physiology	0.416667	0.25	0.166667	0.833333	Fig. 1B
	Reproduction	0.888889	0	0	0.888889	Fig. 1B
