# Supplementary material for: Reporting and misreporting of sex differences in the biological sciences
Source: eLife. 2021 Nov 2;10:e70817. doi: 10.7554/eLife.70817 (PMC8562995; doi:10.7554/eLife.70817)
Supplement: Figure 2—source data 1. — All raw data are in Supplementary file 1b and are tabulated in Supplementary file 1c. [file elife-70817-fig2-data1.xlsx]

## Sheet: Fig. 2 source data
Garcia-Sifuentes & Maney (2021). Reporting and Misreporting of Sex Differences in the Biological Sciences
All raw data are in Supplementary File 1b and are tabulated in Supplementary File 1c.
Figs. 2A and 2B are based on hypothetical data with the result shown in the figure.
Fig. 2C	Category			number
	Design not factorial			55
	Did not test for interactions, no sex comparisons or differences claimed			1
	Did not test for interactions, tested for main effects of sex only			12
	Did not test for interactions, tested for effect of sex within treatment			18
	Did not test for interactions, tested for effects of treatment within sex			29
	Tested for interactions, non-significant interaction; claimed difference			1
	Tested for interactions but did not report results			5
	Tested for interactions, not significant, noted non-difference			10
	Tested for interaction, significant, noted sex difference			16
Fig. 2D	Discipline	tested and reported	did not test/report	total factorial
	Behavior	0.25	0.4	0.65
	Behav. Physiol.	0.35	0.3	0.65
	Endocrinology	0.185185	0.555556	0.740741
	General Biology	0.222222	0.444444	0.666667
	Immunology	0.1	0.2	0.3
	Neuroscience	0.111111	0.111111	0.222222
	Pharmacology	0.0909091	0.636364	0.727273
	Physiology	0	0.583333	0.583333
	Reproduction	0	0.777778	0.777778
Fig. 2E	Claim		tested for an interaction	did not test
	Presence of a sex-specific effect		0.3	0.7
	Absence of a sex-specific effect		0.666667	0.333333
Fig. 2F	Discipline	reported interaction	No interaction reported	total sex-specific
	Behavior	0.13	0.05	0.18
	Behav. Physiol.	0.25	0.15	0.4
	Endocrinology	0.11	0.44	0.56
	General Biology	0.11	0.11	0.22
	Immunology	0.1	0.1	0.2
	Neuroscience	0.11	0	0.11
	Pharmacology	0	0.45	0.45
	Physiology	0	0.5	0.5
	Reproduction	0	0.67	0.67
