# Supplementary material for: Reporting and misreporting of sex differences in the biological sciences
Source: eLife. 2021 Nov 2;10:e70817. doi: 10.7554/eLife.70817 (PMC8562995; doi:10.7554/eLife.70817)
Supplement: Figure 3—source data 1. — All raw data are in Supplementary file 1b and are tabulated in Supplementary file 1c. [file elife-70817-fig3-data1.xlsx]

## Sheet: Fig. 3 source data
Garcia-Sifuentes & Maney (2021). Reporting and Misreporting of Sex Differences in the Biological Sciences
All raw data are in Supplementary File 1b and are tabulated in Supplementary File 1c.
Fig. 3A	Discipline	kept separate	pooled for some anayses	sex was a factor or covariate
	All	31	54	62
	Behavior	5	14	21
	Behav. Physiol.	3	8	9
	Endocrinology	9	7	11
	General Biology	5	2	2
	Immunology	0	6	4
	Neuroscience	0	5	4
	Pharmacology	2	5	4
	Physiology	3	4	5
	Reproduction	4	3	2
Fig. 3B	Discipline	pooled after finding no difference, p value given	pooled after finding no difference, no p value given	pooled but did not test for a difference	pooled after finding a significant difference
	All	11	8	26	9
	Behavior	3	1	8	2
	Behav. Physiol.	3	2	2	1
	Endocrinology	1	1	4	1
	General Biology	0	1	1	0
	Immunology	2	0	4	0
	Neuroscience	0	0	3	2
	Pharmacology	2	2	1	0
	Physiology	0	1	2	1
	Reproduction	0	0	1	2
