# Supplementary material for: Reporting and misreporting of sex differences in the biological sciences
Source: eLife. 2021 Nov 2;10:e70817. doi: 10.7554/eLife.70817 (PMC8562995; doi:10.7554/eLife.70817)
Supplement: Supplementary file 1. — (1a) Articles were coded into the categories shown for each of four questions. (1b) Codes for all articles are indicated in the ‘Question’ columns. See (a) for the explanations of the codes. All codes marked with an asterisk are explained in the ‘notes’ column. Columns D and E show the title and date of publication for each article, which was also shown in Woitowich et al., 2020. (1c) Numbers of articles coded into each category. Column A shows the total number of articles; columns D-L show them broken down by discipline. [file elife-70817-supp1.xlsx]

## Sheet: 1a
Garcia-Sifuentes & Maney (2021). Reporting and Misreporting of Sex Differences in the Biological Sciences
Supplementary File 1a. Articles were coded into the categories below for each of four questions.
Q1	Were the sexes compared?
a. Sexes not compared
b. Sexes compared; no sex differences found
c. Sex difference found
	c1. Sex difference was a major finding (mentioned in title/abstract)
	c2. Sex difference was not major finding (not mentioned in title/abstract; is elsewhere in paper)
Q2	Did the study have a factorial design?
a. Study did not have a factorial design
	a1. No sex comparisons
	a2. Comparisons of means across sex, prognostic value of sex, etc.
b. Tested for an interaction
	b1. Significant interaction, noted sex difference
	b2. Interaction not significant
		b2.1. Noted non-difference
		b2.2. Claimed sex-specific effect
	b3. ANOVA done but no p values for interactions reported; sex-specific effect claimed
c. Did not test for an interaction
	c1. Did not compare across sex
		c1.1. Claimed sex-specific effect
		c1.2. Claimed sexes responded the same
		c1.3. No sex difference tested for or claimed; no claim of non-difference
	c2. Compared sex within treatment
		c2.1. Claimed sex-specific effect
		c2.2. Reported effect within treatment
		c2.3 Reported sameness (no effect within either treatment)
	c3. Tested for main effects only
		c3.1. Sex difference reported
		c3.2. No sex difference
Q3	Were the sexes pooled?
a. Analyzed sexes separately throughout
b. Included sex as a fixed factor or covariate for at least some analyses but did not pool
c. Pooled, at least for some analyses
	c1. Pooled after finding no difference
		c1.1. No p value given
		c1.2. Gives p value
	c2. Pooled but did not test for a difference
	c3. Pooled after finding a significant difference
Q4	Did the authors use "sex" or "gender"?
sex		used "sex" only
gender		used "gender" only
both		used both terms
neither		used neither term

## Sheet: 1b
Garcia-Sifuentes & Maney (2021). Reporting and Misreporting of Sex Differences in the Biological Sciences
Supplementary File 1b. All articles included in the study. Codes are indicated in the "Question" columns. See Supplementary file 1a for the explanations of the codes. All codes marked with an asterisk are explained in the "notes" column.
Discipline	No.	Journal	Article title (from Woitowich et al., 2020)	Date of issue (from Woitowich et al., 2020)	species	Question 1	Question 2	Question 3	Question 4	notes
Behavior	1	Animal Behaviour	A house of cards: bias in perception of body size mediates the relationship between voice pitch and perceptions of dominance	Volume 147 Pages 1-210 (January 2019)	human	c2	b2.1	b	both
Behavior	2	Animal Behaviour	Acquisition of a complex extractive technique by the immature chimpanzees of Loango National Park, Gabon	Volume 147 Pages 1-210 (January 2019)	chimpanzee	b	a2	b	sex
Behavior	3	Animal Behaviour	Anogenital distance predicts sexual odour preference in African giant pouched rats	Volume 148, February 2019, Pages 1-8	African giant pouched rat	a	a1	a	sex
Behavior	4	Behav Ecol Sociobiol	Associative learning is necessary for airborne pheromones to activate sexual arousal-linked brain areas of female rats	June 2019, 73:88	rat	c1	b1	b	sex
Behavior	5	Behav Ecol.	Assortative interactions revealed in a fission–fusion society of Australian humpback dolphins	Volume 30, Issue 4, July/August 2019	dolphin	c2	c1.1	c3	sex
Behavior	6	Behav Ecol.	Attractiveness is positively related to World Cup performance in male, but not female, biathletes	Volume 30, Issue 5, September/October	human	c1	b1	a	sex
Behavior	7	Behav Ecol.	Battle of the sexes: a multi-male mating strategy helps lionesses win the gender war of fitness	Volume 30, Issue 4, July/August 2019	lion	a	a1	a	both*	*Q4: "gender" used for lions
Behavior	8	Animal Cognition	Behavioral flexibility of a generalist carnivore	May 2019, Volume 22, Issue 3	raccoon	b	a2	c1.2	sex
Behavior	9	Behav Ecol Sociobiol	Behavioral repeatability and choice performance in wild free-flying nectarivorous bats (Glossophaga commissarisi)	February 2019, 73:24	bat	c2	a2	b	sex
Behavior	10	Animal Behaviour	Correlates of home range sizes of giraffes, Giraffa camelopardalis	Volume 149, March 2019, Pages 65-75	giraffe	c2	b2.1	b	sex
Behavior	11	Behav Ecol.	Differences in combinatorial calls among the 3 elephant species cannot be explained by phylogeny	Volume 30, Issue 3, May/June 2019	elephant	b	c3.2	b*	sex	*Q3: didn't know sex in some cases
Behavior	12	Animal Cognition	Dogs and wolves do not differ in their inhibitory control abilities in a non-social test battery	January 2019, Volume 22, Issue 1	dog and wolf	b	c3.2	b	sex
Behavior	13	Behav Ecol.	Drought decreases cooperative sentinel behavior and affects vocal coordination in meerkats	Epub Online: 03 July 2019	meerkat	c2	a2	b	sex
Behavior	14	Animal Behaviour	Early vocal ontogeny in a polytocous mammal: no evidence of social learning among sibling piglets, Sus scrofa	Volume 151, May 2019, Pages 9-19	pig	b	b2.1	c2	sex
Behavior	15	Behav Ecol Sociobiol	Every scar has a story: age and sex-specific conflict rates in wild bottlenose dolphins	Volume 73, Issue 5, May 2019	dolphin	c1	c3.1*	b	sex	*Q2: regression with sex as a fixed factor
Behavior	16	Behav Ecol Sociobiol	Evidence of phenotypic correlation between exploration activity and resting metabolic rate among populations across an elevation gradient in a small rodent species	September 2019, 73:131	vole	c2	c3.2	b	sex
Behavior	17	Behav Ecol.	Experimental field evidence that out-group threats influence within-group behavior	Volume 30, Issue 5, September/October	mongoose	b	c3.2	c2	sex
Behavior	18	Animal Cognition	Exploratory study of the effects of intra-uterine growth retardation and neonatal energy supplementation of low birth-weight piglets on their post-weaning cognitive abilities	May 2019, Volume 22, Issue 3	pig	c2	c3.1	b	both*	*Q4: "gender" used for pigs
Behavior	19	Behav Ecol Sociobiol	Food, family and female age affect reproduction and pup survival of African wild dogs	Volume 73, Issue 5, May 2019	wild dog	n/a	n/a	n/a	sex	study excluded; males used only to calculate sex ratio
Behavior	20	Animal Behaviour	Group-enhanced predator detection and quality of vigilance in a social ground squirrel	Volume 151, May 2019, Pages 9-19	ground squirrel	b	c2.3	c1.2	sex
Behavior	21	Behav Ecol.	Individual variation and the source-sink group dynamics of extra-group paternity in a social mammal	Volume 30, Issue 2, March/April 2019	European badgers	a	a1	c2	sex
Behavior	22	Behav Ecol Sociobiol	Learning prosociality: insights from young forager and subsistence farmer children’s food sharing with mothers and others	June 2019, 73:88	human	a	a1	c2	sex
Behavior	23	Behav Ecol.	Marriage stability in a pastoralist society	Epub Online: 08 July 2019	human	c2	a2	a	sex
Behavior	24	Behav Ecol.	MHC-associated mate choice under competitive conditions in captive versus wild Tasmanian devils	Volume 30, Issue 5, September/October	Tasmanian devils	b	c1.2	a	sex
Behavior	25	Animal Cognition	Navigation strategies in three nocturnal lemur species: diet predicts heuristic use and degree of exploratory behavior	May 2019, Volume 22, Issue 3	lemur (3 spp)	a	a1	c2	sex
Behavior	26	Animal Behaviour	North American red squirrels mitigate costs of territory defence through social plasticity	Volume 151, May 2019, Pages 9-19	red squirrel	b	b2.1	b	sex
Behavior	27	Animal Cognition	Olfactory discrimination between litter mates by mothers and alien adult cats: lump or split?	January 2019, Volume 22, Issue 1,	cat	a	a1	c2	sex
Behavior	28	Behav Ecol Sociobiol	One size fits all? Relationships among group size, health, and ecology indicate a lack of an optimal group size in a wild lemur population	September 2019, 73:131	lemur	c2	c3.1	c2	sex
Behavior	29	Animal Behaviour	Pair bonding in monogamously and polygynously kept African striped mice, Rhabdomys pumilio	Volume 150, April 2019, Pages 59-68	african striped mouse	c1	b1	b	sex
Behavior	30	Animal Cognition	Pet dogs exhibit social preference for people who synchronize with them: what does it tell us about the evolution of behavioral synchronization?	March 2019, Volume 22, Issue 2,	dogs	b	c3.2	b	sex
Behavior	31	Behav Ecol.	Physiological and social consequences of gastrointestinal nematode infection in a nonhuman primate	Volume 30, Issue 2, March/April 2019	Barbary macaque	c2	b1	b	sex
Behavior	32	Animal Behaviour	Physiological differences between winter phenotypes of Siberian hamsters do not correlate with their behaviour	Volume 147 Pages 1-210 (January 2019)	hamster	c2	b1	c1.1	sex
Behavior	33	Animal Cognition	Precise relative-quantity judgement in the striped field mouse Apodemus agrarius Pallas	March 2019, Volume 22, Issue 2,	striped field mouse	a*	a1	c2	sex	*Q1 Authors say there was no effect of sex but don't appear to have tested for one
Behavior	34	Behav Ecol.	Rate of intersexual interactions affects injury likelihood in Tasmanian devil contact networks	Volume 30, Issue 4, July/August 2019	Tasmanian devils	c1	c1.1	b	sex
Behavior	35	Animal Cognition	Stereotypic horses (Equus caballus) are not cognitively impaired	January 2019, Volume 22, Issue 1,	horse	b	c3.2	b	sex
Behavior	36	Behav Ecol.	The costs of competition: injury patterns in 2 Asian colobine monkeys	Volume 30, Issue 5, September/October	colobine monkey (2 spp)	c1	c3.1	b	sex
Behavior	37	Behav Ecol Sociobiol	The development of communication in alarm contexts in wild chimpanzees	August 2019, 73:113	chimpanzee	a	a1	b	sex
Behavior	38	Behav Ecol.	The effects of stress and glucocorticoids on vocalizations: a test in North American red squirrels	Volume 30, Issue 4, July/August 2019	red squirrel	b	c2.3	c1.2	sex
Behavior	39	Animal Behaviour	Time constraints imposed by anthropogenic environments alter social behaviour in longtailed macaques	Volume 150, April 2019, Pages 59-68	longtailed macaque	c2	b2.1	b	sex
Behavior	40	Behav Ecol Sociobiol	Transitivity and structural balance in marmot social networks	June 2019, 73:88	marmot	c1	a2	b	sex
Behavior	41	Animal Behaviour	Uncovering the decision rules behind collective foraging in spider monkeys	Volume 149, March 2019, Pages 65-75	spider monkey	c2	c2.2	c3	sex
Behavioral physiology	1	Hormones and Behavior	Acute stress enhances general-knowledge semantic memory	Volume 109, March 2019	human	c2	b1	b	gender
Behavioral physiology	2	J. Comp Psychol	Associations among behavioral inhibition and owner-rated attention, hyperactivity/impulsivity, and personality in the domestic dog (Canis familiaris).	2019, Volume 133, Issue 2 (May)	dog	c2	a2	b	sex
Behavioral physiology	3	J. Comp Psychol	Baboon (Papio anubis) chimeric face processing by human (Homo sapiens) judges: Influence of stimuli complexity on the perception of oro-facial asymmetries.	2019, Volume 133, Issue 1 (Feb)	humans judging baboon faces	n/a	n/a	n/a	both	study excluded; all participants female
Behavioral physiology	4	Hormones and Behavior	Brain and behavioral correlates of insulin resistance in youth with depression and obesity	Volume 108, February 2019	human	a*	a1	b	sex	*Q1: sex was a covariate only, didn't test for a difference
Behavioral physiology	5	Behavioral Neuroscience	Decision making in response to physiological and combined physiological and psychosocial stress.	Vol 133(1), Feb, 2024	human	c1	b1	b	sex
Behavioral physiology	6	Hormones and Behavior	Differential effects of androgens, estrogens and socio-sexual context on sexual behaviors in the castrated male goat	Volume 109, March 2019	goat	n/a	n/a	n/a	neither	study excluded; all focal animals male
Behavioral physiology	7	Phys&Behav	Drop-out, relapse and abstinence in a cohort of alcoholic people under detoxification	Volume 198, 1 January 2019	human	c2	b3	c1.1	both
Behavioral physiology	8	Behavioral Neuroscience	Early amygdala damage alters the way rhesus macaques process species-specific audio-visual vocalizations.	Vol 133(1), Feb, 2019	rhesus	c1	b1	b	sex
Behavioral physiology	9	Hormones and Behavior	Energy balance but not competitive environment corresponds with allostatic load during development in an Old World monkey	Volume 108, February 2019	blue monkey	c1	b1	b	sex
Behavioral physiology	10	Behavioral Neuroscience	Female rats express habitual behavior earlier in operant training than males.	Vol 133(1), Feb, 2019	rat	c1	c1.1	a	sex
Behavioral physiology	11	J. Comp Psychol	Freestanding bipedal posture and coordinated bimanual manipulation significantly influence lateralized hand use in rhesus monkeys (Macaca mulatta) and chimpanzees (pan troglodytes).	2019, Volume 133, Issue 2 (May)	chimpanzee	b	b2.1	c1.2	sex
Behavioral physiology	12	Hormones and Behavior	Implicit associations to infant cry: Genetics and early care experiences influence caregiving propensities	Volume 108, February 2019	human	a*	a1	b	both	*Q1: sex was a covariate only, didn't test for a difference
Behavioral physiology	13	Hormones and Behavior	Influence of glucocorticoid and mineralocorticoid receptor stimulation on task switching	Volume 109, March 2019	human	b	b2.1	c2	both
Behavioral physiology	14	J. Comp Psychol	Locomotion and posture development in immature male and female rats (Rattus norvegicus): Comparison of sensory-enriched versus sensory-deprived testing environments.	2019, Volume 133, Issue 2 (May)	rat	c2	c3.2	c1.2	sex
Behavioral physiology	15	Behavioral Neuroscience	Male and female hamsters were gestated and reared in a LD (15 hr light/day) or SD (10 hr light/day) with a constant	Vol 133(2), Apr, 2019	hamster	c1	c1.1	a	sex
Behavioral physiology	16	Hormones and Behavior	Maternal care modulates transgenerational effects of endocrine-disrupting chemicals on offspring pup vocalizations and adult behaviors	Volume 107, January 2019	rat	b	c1.2	c1.1	sex
Behavioral physiology	17	Hormones and Behavior	No difference in cognitive performance or gender role behavior between men with and without hypospadias	Volume 109, March 2019	human	c1	a2	a	both
Behavioral physiology	18	Hormones and Behavior	Organizational effects of testosterone on learning strategy preference and muscarinic receptor binding in prepubertal rats	Volume 110, April 2019	rat	c1	a2	c3	sex
Behavioral physiology	19	J. Comp Psychol	Perception of the Delboeuf illusion by the adult domestic cat (Felis silvestris catus) in comparison with other mammals.	2019, Volume 133, Issue 2 (May)	cat	b	c2.3	c1.2	sex
Behavioral physiology	20	J. Comp Psychol	Preference for attractive faces is species-specific	2019, Volume 133, Issue 2 (May)	humans (study also had rhesus, all male)	c2	b1	b	gender
Behavioral physiology	21	Phys&Behav	Relationship of socioeconomic status to olfactory function	Volume 198, 1 January 2019	human	c2	a2	b	both
Behavioral physiology	22	J. Comp Psychol	Visual attention, indicative gestures, and calls accompanying gestural communication are associated with sociality in wild chimpanzees (Pan troglodytes schweinfurthii).	2019, Volume 133, Issue 1 (Feb)	chimpanzee	a	a1	c2	sex
Endocrinology	1	Endocrinology	Adipocyte-Specific GH Receptor–Null (AdGHRKO) Mice Have Enhanced Insulin Sensitivity With Reduced Liver Triglycerides	Volume 160, Issue 1, January 2019	mouse	c2	c1.1	b	sex
Endocrinology	2	J. Neuroendo	Age‐specific associations between oestradiol, cortico‐amygdalar structural covariance, and verbal and spatial skills	Volume 31, Issue 4, April 2019	human	b	b2.1	b	sex
Endocrinology	3	J. Neuroendo	Both neural and global androgen receptor overexpression affect sexual dimorphism in the mouse brain	Volume 31, Issue 6, June 2019	mouse	c1	b2.2	b	sex
Endocrinology	4	Eur. J. Endocrinology	Causes, patterns and severity of androgen excess in 487 consecutively recruited pre- and post-pubertal children	Volume 180, Issue 3	human	c2	a2	c3	gender
Endocrinology	5	AJP Endo Metab	Estrogen receptor-α signaling maintains immunometabolic function in males and is obligatory for exercise-induced amelioration of nonalcoholic fatty liver	Volume 316, Issue 2, February 2019	mouse	c1	a2	b	sex
Endocrinology	6	Eur. J. Endocrinology	IGFBP-2 and aging: a 20-year longitudinal study on IGFBP-2, IGF-I, BMI, insulin sensitivity and mortality in an aging population	Volume 180, Issue 2	human	b	a2	b	both
Endocrinology	7	Endocrinology	In Vivo Verification of the Pathophysiology of Lipoid Congenital Adrenal Hyperplasia in the Adrenal Cortex	Volume 160, Issue 2, February 2019	mouse	c2	c1.2	c1.1	sex
Endocrinology	8	Eur. J. Endocrinology	Increased cardiovascular risk in thyroid cancer patients taking levothyroxine: a nationwide cohort study in Korea	Volume 180, Issue 1	human	b	a2	b	sex
Endocrinology	9	AJP Endo Metab	Insulin signaling in LepR cells modulates fat and glucose homeostasis independent of leptin	Volume 316, Issue 1, January 2019	mouse	c2	c1.1	a	neither
Endocrinology	10	J. Neuroendo	Kisspeptin and RFRP3 modulate body mass in Phodopus sungorus via two different neuroendocrine pathways	Volume 31, Issue 4, April 2019	hamster	c1	c1.1	a	sex
Endocrinology	11	J. Neuroendo	Late onset obesity in mice with targeted deletion of potassium inward rectifier Kir7.1 from cells expressing the melanocortin‐4 receptor	Volume 31, Issue 1, January 2019	mouse	c2	c1.1	a	sex
Endocrinology	12	Eur. J. Endocrinology	Non-invasive DXA-derived bone structure assessment of acromegaly patients: a cross-sectional study	Volume 180, Issue 3	human	c2	c2.2	b	both
Endocrinology	13	AJP Endo Metab	Oxidative modifications of mitochondrial complex II are associated with insulin resistance of visceral fat in obesity	Volume 316, Issue 2, February 2019	human	b	c2.3*	c2	gender	*Q2: method of comparing sexes not described
Endocrinology	14	Eur. J. Endocrinology	Pituitary deficiency and precocious puberty after childhood severe traumatic brain injury: a long-term follow-up prospective study	Volume 180, Issue 5	human	a	a1	c2	both
Endocrinology	15	Eur. J. Endocrinology	Plasma steroid metabolome profiling for the diagnosis of adrenocortical carcinoma	Volume 180, Issue 2	human	c2	c1.1	a	sex
Endocrinology	16	Eur. J. Endocrinology	Postoperative use of somatostatin analogsand mortality in patients with acromegaly	Volume 180, Issue 1	human	b	a2	b	sex
Endocrinology	17	Endocrinology	Prenatal Bisphenol A Exposure in Mice Induces Multitissue Multiomics Disruptions Linking to Cardiometabolic Disorders	Volume 160, Issue 2, February 2019	mouse	c2	c1.1	a	sex
Endocrinology	18	AJP Endo Metab	Repression of adipose vascular endothelial growth factor reduces obesity through adipose browning	Volume 316, Issue 2, February 2019	mouse	a	c1.3	c2	neither
Endocrinology	19	Endocrinology	Sex Differences in Inflammatory Responses to Adipose Tissue Lipolysis in Diet-Induced Obesity	Volume 160, Issue 2, February 2019	mouse	c1	c2.1	a*	sex	*Q3 Tested for main effects of sex but did not report results
Endocrinology	20	J. Neuroendo	Sex differences in the brain expression of steroidogenic molecules under basal conditions and after gonadectomy	Volume 31, Issue 6, June 2019	rat	c1	b1	b	sex
Endocrinology	21	J. Neuroendo	Sex‐specific contribution of DHEA‐cortisol ratio to prefrontal‐hippocampal structural development, cognitive abilities and personality traits	Volume 31, Issue 2, February 2019	human	c1	b1	b	both
Endocrinology	22	J. Neuroendo	Sexual cues influence cocaine‐induced locomotion, anxiety and the immunoreactivity of oestrogen receptor alpha and tyrosine hydroxylase in both sexes	Volume 31, Issue 6, June 2019	mouse	c1	c1.1	a	sex
Endocrinology	23	J. Neuroendo	Short‐ and long‐term responsiveness to low dose growth hormone (GH) in adult GH deficiency: Role of GH receptor polymorphism	Volume 31, Issue 4, April 2019	human	c2	b1	b	both
Endocrinology	24	Endocrinology	Suppression of Prolactin Secretion Partially Explains the Antidiabetic Effect of Bromocriptine in ob/ob Mice	Volume 160, Issue 1, January 2019	mouse	c2	c1.1	a	neither
Endocrinology	25	Eur. J. Endocrinology	Targetable gene fusions identified in radioactive iodine refractory advanced thyroid carcinoma	Volume 180, Issue 4	human	b	a2	c1.2	both
Endocrinology	26	Eur. J. Endocrinology	The SLC16A11 risk haplotype is associated with decreased insulin action, higher transaminases and large-size adipocytes	Volume 180, Issue 2	human	c2	c1.1	b	both
Endocrinology	27	AJP Endo Metab	Transgene-associated human growth hormone expression in pancreatic β-cells impairs identification of sex-based gene expression differences	Volume 316, Issue 2, February 2019	mouse	c1	c2.1	c2	sex
General Biology	1	Proc. Roy Soc. B	Cross-cultural similarity in relationship-specific social touching	17 April 2019, Volume 286, Issue 1901	human	c2	b1	a	both
General Biology	2	Proc. Roy Soc. B	From groups to communities in western lowland gorillas	6 February 2019, Volume 286, Issue 1896	gorilla	b	a2*	a	sex	*Q2: method of comparing sexes not described
General Biology	3	Proc. Roy Soc. B	Future suitability of habitat in a migratory ungulate under climate change	20 March 2019, Volume 286, Issue 1899	red deer	c1	c1.1	a	sex
General Biology	4	Proc. Roy Soc. B	Genomic evidence for MHC disassortative mating in humans	20 March 2019, Volume 286, Issue 1899	human	a	a1	a*	sex	Q3: study on male-female pairs
General Biology	5	Nature	Identifying the pathways required for coping behaviours associated with sustained pain	Volume 565 Issue 7737, 3 January 2019	mouse, human	b	b2.1	c2	gender*	Q4: neither for mouse; gender for human
General Biology	6	Proc. Roy Soc. B	Maternal longevity and offspring sex in wild ungulates	6 February 2019, Volume 286, Issue 1896	ungulates (4 spp)	n/a	n/a	n/a	sex	study excluded; measured maternal longevity
General Biology	7	Nature	Metabolic reprogramming by the S-nitroso-CoA reductase system protects against kidney injury	Volume 565 Issue 7737, 3 January 2019	mouse	b	c1.2	c1.1	neither
General Biology	8	PLOS Biology	Physiology and effects of nucleosides in mice lacking all four adenosine receptors	March 1, 2019https://doi.org/10.1371/journal.pbio.3000161	mouse	a	a1	a	neither
General Biology	9	PLOS Biology	Prophylactic TLR9 stimulation reduces brain metastasis through microglia activation	March 28, 2019https://doi.org/10.1371/journal.pbio.2006859	mouse	b	c1.2	a	sex
General Biology	10	Proc. Roy Soc. B	The demography of a resource specialist in the tropics: Cecropia trees and the fitness of three-toed sloths	3 January 2019, Volume 286, Issue 1894	three-toed sloths	b	c3.2	b	sex
Immunology	1	Vaccine	Acquisition rate of antibody to hepatitis B surface antigen among medical and dental students in Japan after three-dose hepatitis B vaccination	Volume 37, Issue 1 Pages 1-210 (3 January 2019)	human	c2	c2.2	c2	neither
Immunology	2	J. Immunol	Composition and Clinical Impact of the Immunologic Tumor Microenvironment in Oral Squamous Cell Carcinoma	January 1, 2019 : Vol. 202, Issue 1: 1-308	human	b	a2	b	gender
Immunology	3	Infection and Immunity	Downregulation of the Central Noradrenergic System by Toxoplasma gondiiInfection	February 2019; volume 87,issue 2	mouse, rat, human cells	c1	c1.1	c2	both*	*Q4: "gender" used for rats
Immunology	4	Infection and Immunity	Gene Expression Differences in Host Response to Schistosoma haematobium Infection	January 2019; volume 87,issue 1	human	c1	b1*	b	both	*Q2 Study not powered to test for interaction; alternative method employed to compare effects
Immunology	5	J. Immunol	HBHA-Induced Polycytotoxic CD4+ T Lymphocytes Are Associated with the Control of Mycobacterium tuberculosis Infection in Humans	January 15, 2019 : Vol. 202, Issue 2: 325-624	human	a	a1	c2	both
Immunology	6	Vaccine	Impact of an electronic medical record reminder on hepatitis B vaccine initiation and completion rates among insured adults with diabetes mellitus	Volume 37, Issue 1 Pages 1-210 (3 January 2019)	human	a*	a1	b	both	*Q1: sex was a covariate only, didn't test for a difference
Immunology	7	Vaccine	Seroprevalence of pertussis among healthcare workers: A cross-sectional study from Tunisia	Volume 37, Issue 1 Pages 1-210 (3 January 2019)	human	b	a2	c1.2	gender
Immunology	8	Vaccine	Similar relative risks of seizures following measles containing vaccination in children born preterm compared to full-term without previous seizures or seizure-related disorders	Volume 37, Issue 1 Pages 1-210 (3 January 2019)	human	b	a2	c2	sex
Immunology	9	Vaccine	Vaccine preventable invasive bacterial diseases in Italy: A comparison between the national surveillance system and recorded hospitalizations, 2007–2016	Volume 37, Issue 1 Pages 1-210 (3 January 2019)	human	c2	a2	b	gender
Immunology	10	Vaccine	Vaccine-driven serotype-rearrangement is seen with latency in clinical isolates: Comparison of carried and clinical pneumococcal isolates from the same time period in Hungary	Volume 37, Issue 1 Pages 1-210 (3 January 2019)	human	a	a1	c1.2	gender
Neuroscience	1	Nature Neurosci.	A genome-wide association study of shared risk across psychiatric disorders implicates gene regulation during fetal neurodevelopment	February 2019; Volume 22, Issue 3	human	a*	a1	b*	gender	*Q1, Q3: included sex as a covariate but did not report a p value for sex
Neuroscience	2	Neuroscience	Direct Intracellular Signaling by the Carboxy terminus of NMDA Receptor GluN2 Subunits Regulates Dendritic Morphology in Hippocampal CA1 Pyramidal Neurons	January 1, 2019; Volume 396	mouse	c2	b1	c3	both*	*Q2: did not report interactions; Q4: "gender" used for mice
Neuroscience	3	Neuroscience	Does Seipin Play a Role in Oxidative Stress Protection and Peroxisome Biogenesis? New Insights from Human Brain Autopsies	January 1, 2019; Volume 396	human	c2	a2	c3	gender
Neuroscience	4	Nature Neurosci.	Genome-wide meta-analysis of depression identifies 102 independent variants and highlights the importance of the prefrontal brain regions	February 2019; Volume 22, Issue 3	human	a	a1	b	sex
Neuroscience	5	J. Neurosci	Individual Differences in Dopamine Are Associated with Reward Discounting in Clinical Groups But Not in Healthy Adults	January 09, 2019; Volume 39,Issue 2	human	a	a1	b	sex	*Q1: sex was a covariate only, didn't test for a difference
Neuroscience	6	Nature Neurosci.	Neutrophil adhesion in brain capillaries reduces cortical blood flow and impairs memory function in Alzheimer’s disease mouse models	February 2019; Volume 22, Issue 3	mouse	a	a1	c2	sex
Neuroscience	7	J. Comp. Neurol	Sex‐biased hippocampal pathology in the 5XFAD mouse model of Alzheimer's disease: A multi‐omic analysis	February 1, 2019; Volume 527,Issue2	mouse	c1	c2.1	c2	sex
Neuroscience	8	J. Neurosci	Top-down and Bottom-up Regulated Auditory Phantom Perception	January 09, 2019; Volume 39,Issue 2	human	a	a1	c2	gender
Neuroscience	9	Nature Neurosci.	Widespread RNA editing dysregulation in brains from autistic individuals	January 2019; Volume 22, Issue 1	human	a	a1	b	both
Pharmacology	1	J Pharm Exp Ther	A Monoclonal Antibody against 6-Acetylmorphine Protects Female Mice Offspring from Adverse Behavioral Effects Induced by Prenatal Heroin Exposure	January 01, 2019 : Vol. 368, Issue 1: 1-145	mouse	c2	c1.1	c2	sex
Pharmacology	2	Neuropsychopharm	Activity-dependent neuroprotective protein (ADNP) is an alcohol-responsive gene and negative regulator of alcohol consumption in female mice	Volume 44 Issue 2, January 2019	mouse	c1	c1.1	b	sex
Pharmacology	3	J Psychopharm	Amiloride modulation of carbon dioxide hypersensitivity and thermal nociceptive hypersensitivity induced by interference with early maternal environment	Volume 33 Issue 1, January 2019	mouse	b	b2.1	c1.2	sex
Pharmacology	4	J Psychopharm	Effect of cannabis on weight and metabolism in first-episode non-affective psychosis: Results from a three-year longitudinal study	Volume 33 Issue 3, March 2019	human	c2	a2	b	sex
Pharmacology	5	J Pharm Exp Ther	Estrogen-Dependent Disruption of Adiponectin-Connexin43 Signaling Underlies Exacerbated Myocardial Dysfunction in Diabetic Female Rats	February 01, 2019 : Vol. 368, Issue 2: 146-325	rat	c2	c2.1	a	sex
Pharmacology	6	Neuropsychopharm	High-dose ondansetron reduces activation of interoceptive and sensorimotor brain regions	Volume 44 Issue 2, January 2019	human	a*	a1	b	sex	*Q1: sex was a covariate only, didn't test for a difference
Pharmacology	7	Neuropsychopharm	Interneuronal δ-GABAA receptors regulate binge drinking and are necessary for the behavioral effects of early withdrawal	Volume 44 Issue 2, January 2019	mouse	c1	c1.1	a	sex
Pharmacology	8	Neuropsychopharm	Isoform-selective phosphoinositide 3-kinase inhibition ameliorates a broad range of fragile X syndrome-associated deficits in a mouse model	Volume 44 Issue 2, January 2019	mouse	a	a1	c1.2	sex
Pharmacology	9	Neuropsychopharm	Oxytocin reduces a chemosensory-induced stress bias in social perception	Volume 44 Issue 2, January 2019	human	c2	c1.1	b	sex
Pharmacology	10	J Pharm Exp Ther	Plasma and Brain Concentrations of Doxycycline after Single and Repeated Doses in Wild-Type and APP23 Mice	January 01, 2019 : Vol. 368, Issue 1: 1-145	mouse	b	c2.3*	c1.1	both*	*Q2: method of comparing sexes not described; Q4: "gender" used for mice
Pharmacology	11	Neuropsychopharm	Ventral midbrain astrocytes display unique physiological features and sensitivity to dopamine D2 receptor signaling	Volume 44 Issue 2, January 2019	mouse	b	c2.3*	c1.1	sex	*Q2: method of comparing sexes not described
Physiology	1	AJP Gastro Liver	5-HT3 receptor signaling in serotonin transporter-knockout rats: a female sex-specific animal model of visceral hypersensitivity	Volume 316 Issue 1	rat	c1	c1.1	a	sex
Physiology	2	AJP Gastro Liver	Absence of the sulfate transporter SAT-1 has no impact on oxalate handling by mouse intestine and does not cause hyperoxaluria or hyperoxalemia	Volume 316 Issue 1	mouse	a	a1	c2	sex
Physiology	3	J. Physiol Lond	Anticipation of food intake induces phosphorylation switch to regulate basolateral amino acid transporter LAT4 (SLC43A2) function	Volume 597, Issue 2	mouse	b	a1	c1.1	gender*	*Q4: "gender" used for mice
Physiology	4	AJP Gastro Liver	Crohn’s disease IRGM risk alleles are associated with altered gene expression in human tissues	Volume 316 Issue 1	human	a*	a1	b	sex	*Q1: sex was a covariate only, didn't test for a difference
Physiology	5	AJP Heart and Circ	Elimination or neutralization of endogenous high-molecular-weight FGF2 mitigates doxorubicin-induced cardiotoxicity	Volume 316 Issue 2	mouse	c2	c1.1*	a	sex	*Q2 Authors emphasize that more testing should be done to show a sex-specific effect
Physiology	6	AJP Heart and Circ	Estrogen but not testosterone preserves myofilament function from doxorubicin-induced cardiotoxicity by reducing oxidative modifications	Volume 316 Issue 2	rat	c1	c1.1	a	sex
Physiology	7	AJP Renal	Human serum albumin redox state is associated with decreased renal function in a community-dwelling population	Volume 316, Issue 1	human	b	a2	b	sex
Physiology	8	AJP Renal	Plasma syndecan-1 in hemodialysis patients associates with survival and lower markers of volume status	Volume 316, Issue 1	human	c1	a2	c2	both
Physiology	9	AJP Renal	Renal olfactory receptor 1393 contributes to the progression of type 2 diabetes in a diet-induced obesity model	Volume 316Issue 2	mouse	c2	b3	b	sex
Physiology	10	AJP Heart and Circ	Sex differences in the central and peripheral manifestations of ischemia-induced heart failure in rats	Volume 316 Issue 1	rat	c1	b3	b	sex
Physiology	11	AJP Gastro Liver	Urinary acrolein metabolite levels in severe acute alcoholic hepatitis patients	Volume 316 Issue 1	human	c2	c2.2	c3	sex
Physiology	12	AJP Renal	Sex-dependent differences in the adverse renal changes induced by an early in life exposure to a high-fat diet	Volume 316Issue 2	rat	c1	b3	b	sex
Reproduction	1	Reproduction	Association of foetal size and sex with porcine foeto-maternal interface integrin expression	Volume 157 (2019): Issue 4 (Apr 2019)	pig	c1	c2.2	c3	sex
Reproduction	2	Biology of Reproduction	Associations between fetal size, sex and placental angiogenesis in the pig	Volume 100, Issue 1, January 2019	pig	c1	c2.1	c3	sex
Reproduction	3	Reproduction	Effects of androgen and oestrogen on IGF pathways controlling phallus growth	Volume 157 (2019): Issue 1 (Jan 2019)	tammar wallaby	c1	c2.1	a	sex
Reproduction	4	Biology of Reproduction	Exposure of pregnant sows to low doses of estradiol-17β impacts on the transcriptome of the endometrium and the female preimplantation embryos	Volume 100, Issue 3, March 2019	pig	c1	c2.1	b	both*	*Q4: "gender" used for pigs
Reproduction	5	Biology of Reproduction	Insulin/IGF1 signaling regulates the mitochondrial biogenesis markers in steroidogenic cells of prepubertal testis, but not ovary	Volume 100, Issue 1, January 2019	mouse	c1	c1.1	a	sex
Reproduction	6	Biology of Reproduction	Is differences in embryo morphokinetic development significantly associated with human embryo sex?	Volume 100, Issue 3, March 2019	human	c1	a2	b	both
Reproduction	7	Biology of Reproduction	Prenatal two-hit stress affects maternal and offspring pregnancy outcomes and uterine gene expression in rats: match or mismatch?	Volume 100, Issue 1, January 2019	rat	c1	b3	a	both*	*Q4: "gender" used for rats
Reproduction	8	Biology of Reproduction	Sexual dimorphism of mitochondrial function in the hypoxic guinea pig placenta	Volume 100, Issue 1, January 2019	guinea pig	c1	c1.1	c2	sex
Reproduction	9	Reproduction	Tissue-specific knockout of E-cadherin (Cdh1) in developing mouse gonads causes germ cells loss	Volume 158 (2019): Issue 2 (Aug 2019)	mouse	a	a1	a	sex

## Sheet: 1c
Garcia-Sifuentes & Maney (2021). Reporting and Misreporting of Sex Differences in the Biological Sciences
Supplementary File 1c. Numbers of articles coded into each category. Column A shows the total number of articles; columns D-L show them broken down by discipline.
No. papers	Code	Explanation of code	Behavior	Behav Phys.	Endocrinology	Gen Bio	Immuno	Neuro	Pharm	Phys	Reprod
147		Total number of papers with data reported for both sexes	40	20	27	9	10	9	11	12	9
29	1-a	sexes not compared	8	3	2	2	3	6	2	2	1
35	1-b	sexes compared; no sex differences found	12	4	6	5	3	0	3	2	0
41	1-c1	sex difference is a major finding (mentioned in title/abstract)	7	7	8	1	2	1	2	5	8
42	1-c2	sex difference is not major finding (not mentioned in title/abstract; is elsewhere in paper)	13	6	11	1	2	2	4	3	0
29	2-a1	study does not have a factorial design; no sex comparisons	8	3	1	2	3	6	2	3	1
26	2-a2	study does not have a factorial design; comparisons of means across sex	6	4	6	1	4	1	1	2	1
16	2-b1	tested for interaction, noted sex difference	5	5	3	1	1	1	0	0	0
10	2-b2.1	tested for interaction, noted no sex difference	5	2	1	1	0	0	1	0	0
1	2-b2.2	tested for interaction, was not significant, claimed sex difference	0	0	1	0	0	0	0	0	0
5	2-b3	ANOVA done but no p values for interactions reported; sex-specific effect reported	0	1	0	0	0	0	0	3	1
24	2-c1.1	did not test for interaction; did not compare across sex; claimed sex-specific effect	2	2	9	1	1	0	4	3	2
5	2-c1.2	did not test for interaction; did not compare across sex; claimed sexes responded the same	1	1	1	2	0	0	0	0	0
1	2-c1.3	did not test for interaction; no sex difference tested for or claimed; no claim of non-difference	0	0	1	0	0	0	0	0	0
7	2-c2.1	compared sex within treatment; claimed sex-specific effect	0	0	2	0	0	1	1	0	3
5	2-c2.2	compared sex within treatment; reported effect within treatment	1	0	1	0	1	0	0	1	1
6	2-c2.3	compared sex within treatment; reported sameness (no effect within either treatment)	2	1	1	0	0	0	2	0	0
4	2-c3.1	tested for main effect only; sex difference reported	4	0	0	0	0	0	0	0	0
8	2-c3.2	tested for main effects only; sameness reported	6	1	0	1	0	0	0	0	0
31	3-a	analyzed sexes separately throughout	5	3	9	5	0	0	2	3	4
62	3-b	included sex as a fixed factor or covariate for at least some analyses, but did not pool	21	9	11	2	4	4	4	5	2
8	3-c1.1	pooled after finding no difference, no p value given	1	2	1	1	0	0	2	1	0
11	3-c1.2	pooled after finding no difference, gave p value	3	3	1	0	2	0	2	0	0
26	3-c2	pooled but did not test for a difference	8	2	4	1	4	3	1	2	1
9	3-c3	pooled after finding a significant difference	2	1	1	0	0	2	0	1	2
101	sex	used "sex" only	37	13	15	5	1	4	10	10	6
13	gender	used "gender" only	0	2	2	1	4	3	0	1	0
27	both	used both terms	3	5	7	1	4	2	1	1	3
6	neither	used neither term	0	0	3	2	1	0	0	0	0
8		used "gender" for non-human animals	2	0	0	0	1	1	1	1	2
147
BELOW: Detailed results, showing calculations, for each of the four questions. The top part of the table (dark color) shows numbers of articles falling into a particular category defined by the formula in the "formula" column. The lower part of the table (light color) shows percentages. Some of the values below were used to make the graphs in the main text.
NUMBER of articles
Q1	formula (see codes above)
118	1b+1c1+1c2	number of papers in which the sexes were compared or claimed to be compared	32	17	25	7	7	3	9	10	8
83	1c1+1c2	number of papers reporting a sex difference	20	13	19	2	4	3	6	8	8
Q2
92	2b + 2c	number of papers with a factorial design with sex as a factor	26	13	20	6	3	2	8	7	7
27	2b1+2b2	number that tested for and reported results of at least some interactions with sex	10	7	5	2	1	1	1	0	0
68	2b+2c1.1+2c1.2+2c2.1	number that made statements about sex-specific effects, either positive or negative	13	11	17	5	2	2	6	6	6
53	2b1+2b2.2+2b3+2c1.1+2c2.1	number claiming a sex-specific effect	7	8	15	2	2	2	5	6	6
15	2b2.1+2c1.2	number claiming similar responses in the sexes	6	3	2	3	0	0	1	0	0
Q3
54	3c	number of papers that pooled at least for some analyses	14	8	7	2	6	5	5	4	3
FRACTION of articles
Q1
0.802721	=A38/A4	fraction of papers in which the sexes were compared or claimed to be compared	0.8	0.85	0.925926	0.777778	0.7	0.333333	0.818182	0.833333	0.888889
0.564626	=(A7+A8)/A4	fraction of all papers reporting a sex difference	0.5	0.65	0.703704	0.222222	0.4	0.333333	0.545455	0.666667	0.888889
0.278912	=A7/A4	fraction reporting a sex difference as major	0.175	0.35	0.296296	0.111111	0.2	0.111111	0.181818	0.416667	0.888889
0.285714	=A8/A4	fraction reporting a sex difference as minor	0.325	0.3	0.407407	0.111111	0.2	0.222222	0.363636	0.25	0
0.70339	=(A7+A8)/SUM(A6:A8)	of the papers that compared, fraction reporting a difference	0.625	0.764706	0.76	0.285714	0.571429	1	0.666667	0.8	1
0.238095	=A6/A4	of all papers, fraction with no sex difference stated or implied	0.3	0.2	0.222222	0.555556	0.3	0	0.272727	0.166667	0
0.289157	=(A15)/(A7+A8)	of the papers reporting sex difference, fraction in which sexes were never compared	0.1	0.153846	0.473684	0.5	0.25	0	0.666667	0.375	0.25
Q2
0.62585	=(SUM(A$11:A$22))/A$4	fraction of papers with a factorial design with sex as a factor	0.65	0.65	0.740741	0.666667	0.3	0.222222	0.727273	0.583333	0.777778
0.293478	=(SUM(A$11:A$13))/(SUM(A$11:A$22))	of the papers with a factorial design, fraction that tested for and reported results of at least some interactions with sex	0.384615	0.538462	0.25	0.333333	0.333333	0.5	0.125	0	0
0.576087	=(A11+A13+A14+A15+A18)/SUM(A11:A22)	of the papers with a factorial design, fraction that reported a sex-specific effect	0.269231	0.615385	0.75	0.333333	0.666667	1	0.625	0.857143	0.857143
0.360544	=A44/A4	fraction of all papers reporting a sex-specific effect	0.175	0.4	0.555556	0.222222	0.2	0.222222	0.454545	0.5	0.666667
0.301887	=A11/A44	of the papers claiming a sex-specific effect, fraction that reported a significant interaction	0.714286	0.625	0.2	0.5	0.5	0.5	0	0	0
0.132075	=A18/A44	of the papers claiming a sex-specific effect, fraction that tested for sex differences only within treatments	0	0	0.133333	0	0	0.5	0.2	0	0.5
0.698113	=(A13+A14+A15+A18)/A44	of the papers claiming a sex-specific effect, fraction not reporting a significant interaction	0.285714	0.375	0.8	0.5	0.5	0.5	1	1	1
0.878049	=(A14+A15+A18)/(A14+A15+A16+A18)	of the papers reporting either presence or absence of sex-specific effects without testing for such, percent that reported a sex-specific effect	0.666667	0.75	0.916667	0.333333	1	1	1	1	1
0.666667	=A12/A45	of the papers claiming similar responses in males and females (lack of sex-specific effect), proportion that tested for one	0.833333	0.666667	0.5	0.333333			1
0.62963	=(A11+A13)/A42	of the papers testing for an interaction, percentage that claimed a sex-specific effect	0.5	0.714286	0.8	0.5	1	1	0
Q3
0.210884	=A$23/A$4	fraction of papers that kept the sexes separate throughout all analyses	0.125	0.15	0.333333	0.555556	0	0	0.181818	0.25	0.444444
0.421769	=A$24/A$4	fraction of papers that included sex as a fixed factor or covariate in the model and did not pool	0.525	0.45	0.407407	0.222222	0.4	0.444444	0.363636	0.416667	0.222222
0.367347	=(SUM(A$25:A$28))/A$4	fraction of papers that pooled at least for some analyses	0.35	0.4	0.259259	0.222222	0.6	0.555556	0.454545	0.333333	0.333333
0.481481	=A$27/A$47	of the papers that pooled, fraction that did not test for a difference before doing so	0.571429	0.25	0.571429	0.5	0.666667	0.6	0.2	0.5	0.333333
0.351852	=(A$26+A$25)/A47	of the papers that pooled, fraction that pooled after finding no significant difference	0.285714	0.625	0.285714	0.5	0.333333	0	0.8	0.25	0
0.166667	=A$28/A$47	of the papers that tested for a difference before pooling, fraction that pooled anyway after finding a significant difference	0.142857	0.125	0.142857	0	0	0.4	0	0.25	0.666667
sex/gender
0.687075	=A29/A4	fraction of articles using sex exclusively	0.925	0.65	0.555556	0.555556	0.1	0.444444	0.909091	0.833333	0.666667
0.0884354	=A30/A4	fraction of articles using gender exclusively	0	0.1	0.0740741	0.111111	0.4	0.333333	0	0.0833333	0
0.183673	=A31/A4	using both	0.075	0.25	0.259259	0.111111	0.4	0.222222	0.0909091	0.0833333	0.333333
0.0408163	=A32/A4	using neither	0	0	0.111111	0.222222	0.1	0	0	0	0
0.2	=A33/(A30+A31)	of the articles using "gender", fraction using it for non-humans	0.666667	0	0	0	0.125	0.2	1	0.5	0.666667
